# Supplementary material
Source: HighWire-hosted journal article supplement (https://bmjopen.bmj.com/content/10/12/e042052)
Supplement: inline-supplementary-material-4 [file inline-supplementary-material-4.pdf]

Supplement 4: Bias levels in randomised controlled trials. Obtained via utilization of the Cochrane bias tool(16).

|                              | Random sequence generation | Allocation concealment | Blinding of participants and personnel | Blinding of outcome assessment | Incomplete outcome data | Selective reporting | Anything else, ideally prespecified |
|------------------------------|----------------------------|------------------------|----------------------------------------|--------------------------------|-------------------------|---------------------|-------------------------------------|
| Boot et al., (28)            |                            |                        |                                        |                                |                         |                     |                                     |
| McMahon et al., (35)         |                            |                        |                                        |                                |                         |                     |                                     |
| Lester et al., (36)          |                            |                        |                                        |                                |                         |                     |                                     |
| Marks (37)                   |                            |                        |                                        |                                |                         |                     |                                     |
| Friedli, King and Lloyd (39) |                            |                        |                                        |                                |                         |                     |                                     |
